# Supplementary material
Source: HighWire-hosted journal article supplement (https://www.cmaj.ca/highwire/filestream/60024/field_highwire_adjunct_files/5/161379-res-5-at.pdf)
Supplement: 161379-res-5-at.pdf [file 161379-res-5-at.pdf]

## Appendix 5 (as supplied by the authors): p16 testing over time

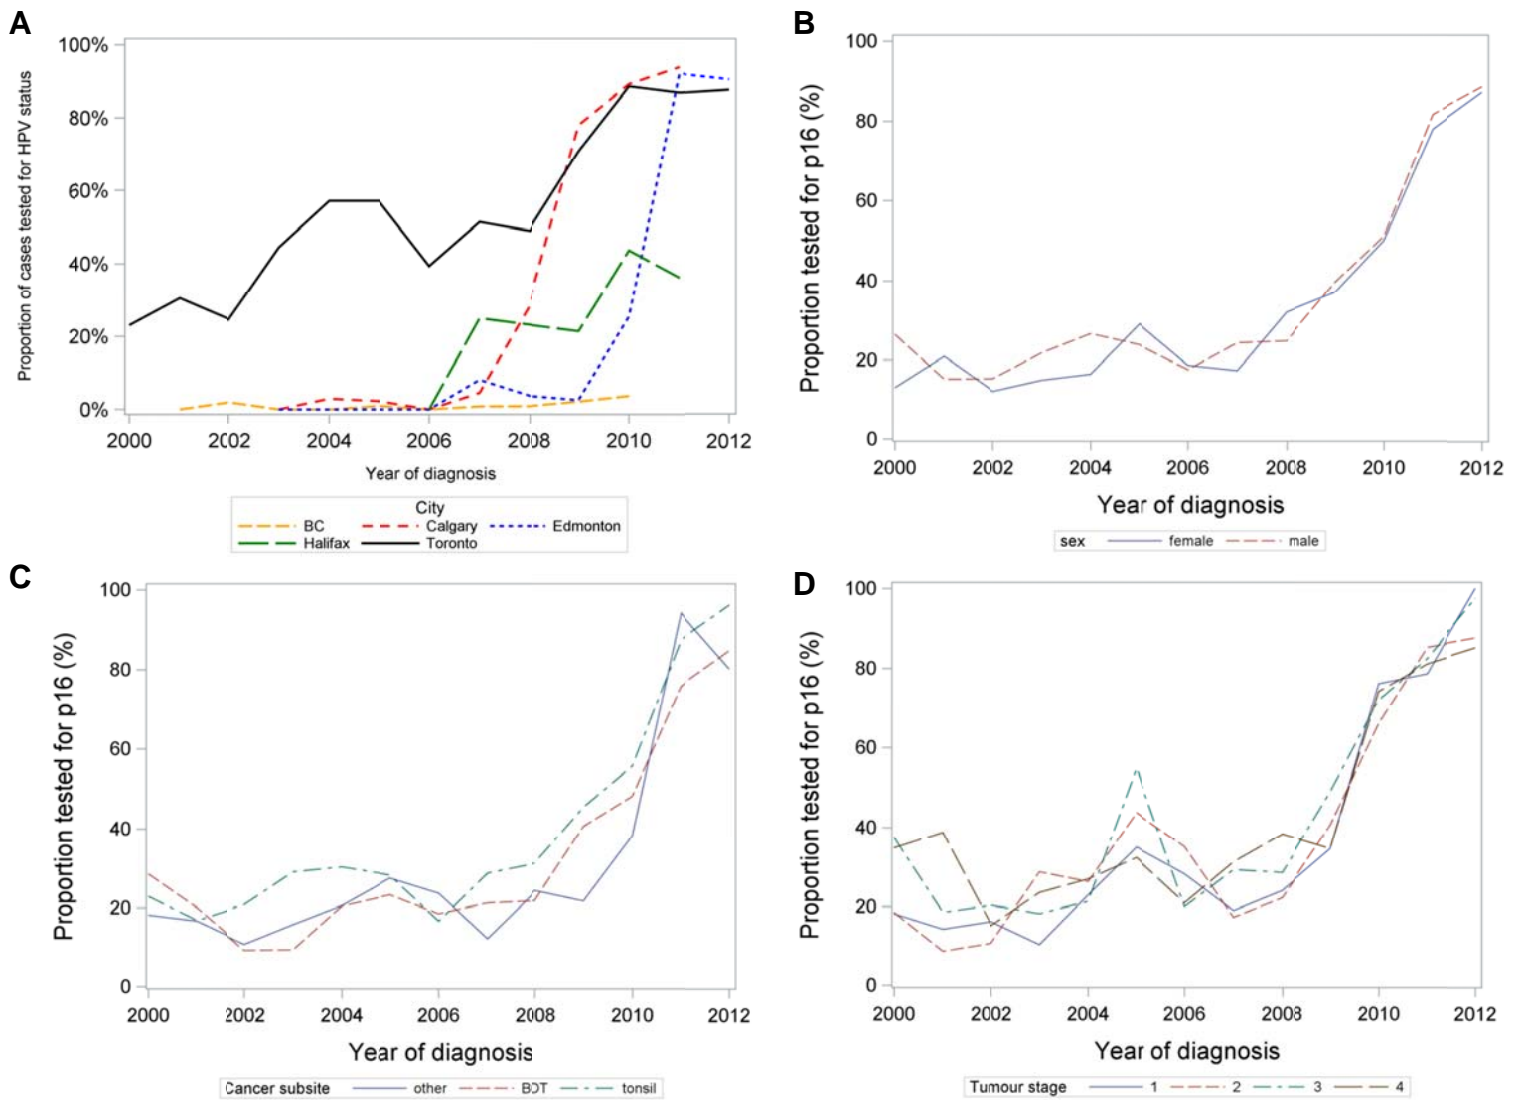

Appendix to: Habbous S, Chu KP, Lau H, et al. Human papillomavirus in oropharyngeal cancer in Canada: analysis of 5 comprehensive cancer centres using multiple imputation. *CMAJ* 2017. DOI:10.1503/cmaj.161379.

Copyright © 2017 The Author(s) or their employer(s).

To receive this resource in an accessible format, please contact us at [cmajgroup@cmaj.ca](mailto:cmajgroup@cmaj.ca).

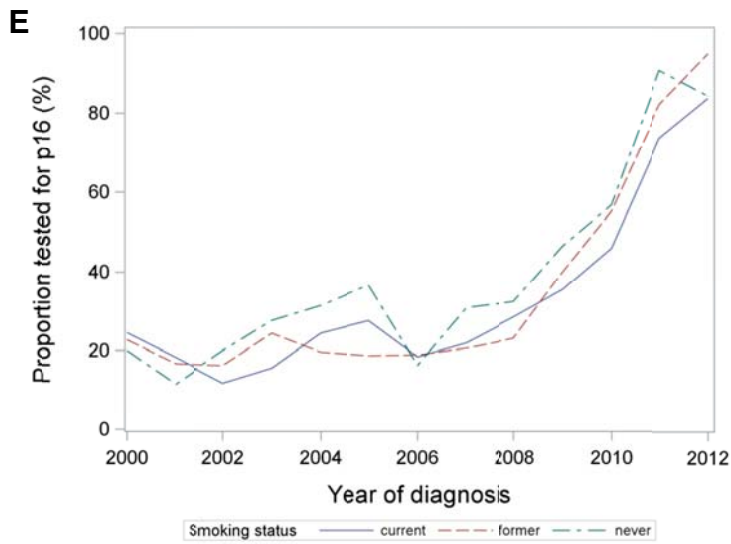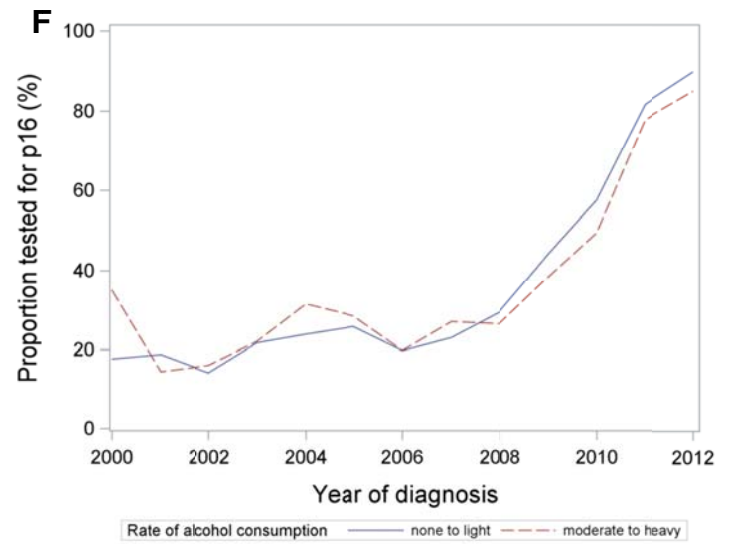

**Caption:** change in p16 testing over time A) across all centres; B) by sex; C) by cancer subsite (BOT – base of tongue); D) by tumor stage; E) by smoking status; and F) by the rate of alcohol consumption
